# Supplementary material for: Integration of LaMnO3+δ films on platinized silicon substrates for resistive switching applications by PI-MOCVD
Source: publisher site journal article supplement (doi:10.3762/bjnano.10.38), 2019-02-07
Supplement: Additional file 1 [file 2190-4286-10-38-S1.pdf]

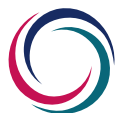

## Supporting Information

for

### **Integration of $\text{LaMnO}_{3+\delta}$ films on platinized silicon substrates for resistive switching applications by PI-MOCVD**

Raquel Rodriguez-Lamas, Dolors Pla, Odette Chaix-Pluchery, Benjamin Meunier, Fabrice Wilhelm, Andrei Rogalev, Laetitia Rapenne, Xavier Mescot, Quentin Rafhay, Hervé Roussel, Michel Boudard, Carmen Jiménez and Mónica Burriel

*Beilstein J. Nanotechnol.* **2019**, *10*, 389–398. [doi:10.3762/bjnano.10.38](https://doi.org/10.3762/bjnano.10.38)

## Additional figures

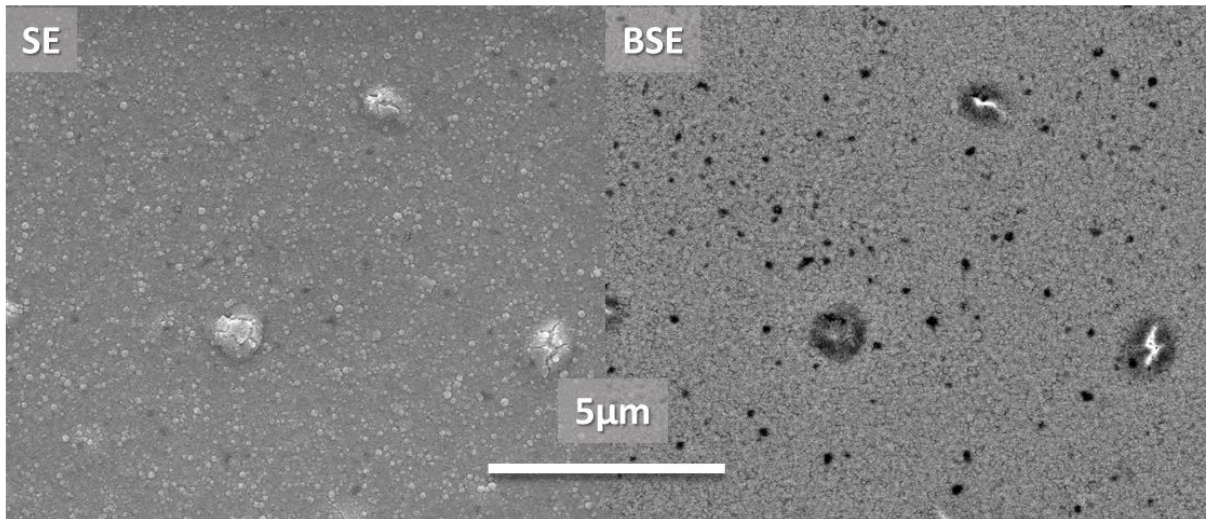

**Figure S1:** Surface images from secondary electrons (SE) and backscattered electrons (BSE) of a LMO film deposited by strategy I at 690 °C of maximum temperature, showing pores (black in BSE) and cracks (white in BSE) due to the dewetting of the Pt layer.

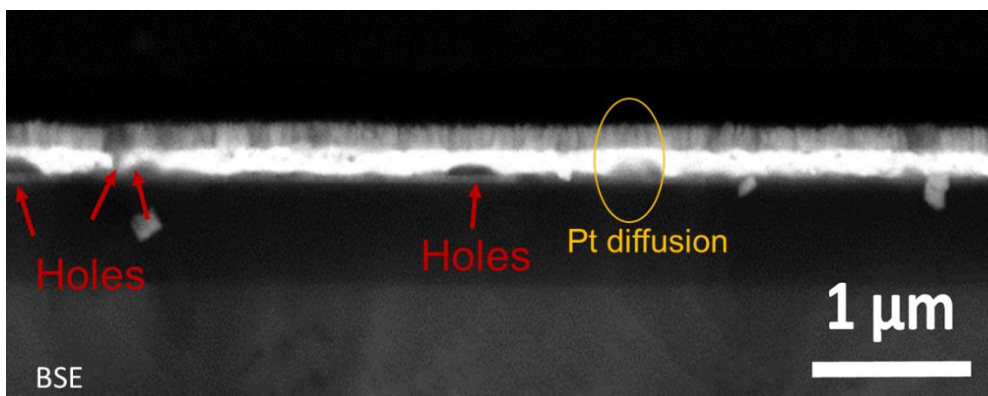

**Figure S2:** SEM cross section of the LMO thin film structure, deposited by strategy III (25000 pulses at 500 °C and 5000 pulses at 750 °C), showing the contrast in composition (BSE mode). The discontinuity in the Pt films is clearly visible forming holes and with Pt interdiffusion as indicated in the image. These holes provoke the appearance on pinholes at the LMO surface.

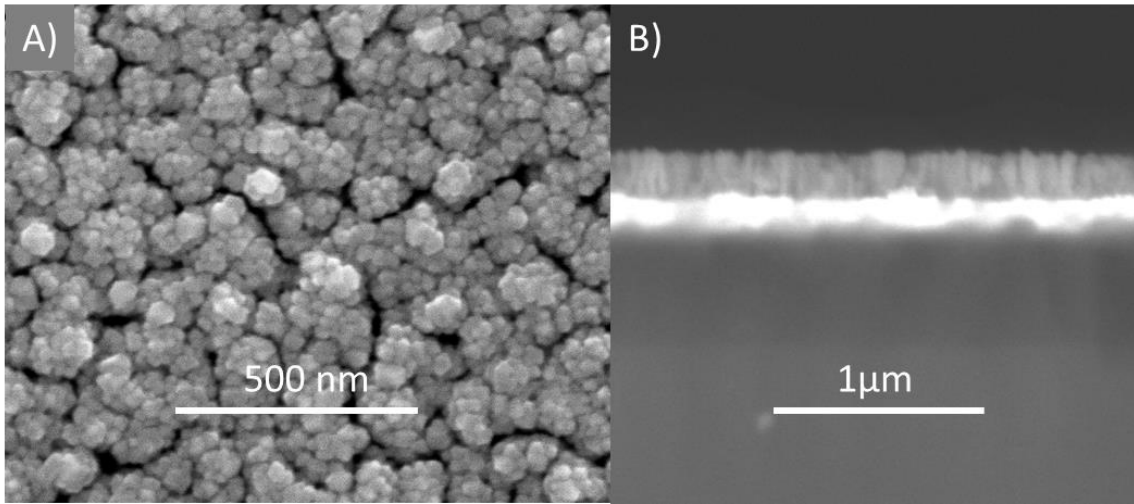

**Figure S3:** Columnar opening in a flower bouquet manner, in a sample deposited by strategy III (25000 pulses at 500 °C and 5000 pulses at 750 °C) A) SEM top view where the separation of the columns is visible. B) Columnar growth and opening cross section by BSE.
